# Supplementary material for: Specificity of Signal-Binding via Non-AHL LuxR-Type Receptors
Source: PubMed Central journal article supplement (PMC4414361; doi:10.1371/journal.pone.0124093), 2015-04-29
Supplement: pone.0124093.s002.pdf [file pone.0124093.s002.pdf]

**S1 Table: Plasmids used in this study.**

| Plasmid                        | Characteristics                                                                             | Reference  |
|--------------------------------|---------------------------------------------------------------------------------------------|------------|
| pBAD24                         | Expression vector, arabinose inducible promoter, Amp <sup>R</sup>                           | [14]       |
| pBAD24-His- <i>pluR</i>        | <i>pluR</i> ( <i>plu4562</i> ) in pBAD24 with N-terminal His-tag                            | [6]        |
| pBAD24-His- <i>pluR</i> -T62W  | Substitution of T62W in <i>pluR</i> ( <i>plu4562</i> ) in pBAD24                            | This study |
| pBAD24-His- <i>pluR</i> -Y66A  | Substitution of Y66A in <i>pluR</i> ( <i>plu4562</i> ) in pBAD24                            | [6]        |
| pBAD24-His- <i>pluR</i> -D75A  | Substitution of D75A in <i>pluR</i> ( <i>plu4562</i> ) in pBAD24                            | [6]        |
| pBAD24-His- <i>pluR</i> -D75N  | Substitution of D75N in <i>pluR</i> ( <i>plu4562</i> ) in pBAD24                            | This study |
| pBAD24-His- <i>pluR</i> -D75E  | Substitution of D75E in <i>pluR</i> ( <i>plu4562</i> ) in pBAD24                            | This study |
| pBAD24-His- <i>pluR</i> -Q76P  | Substitution of Q76P in <i>pluR</i> ( <i>plu4562</i> ) in pBAD24                            | This study |
| pBAD24-His- <i>pluR</i> -C90W  | Substitution of C90W in <i>pluR</i> ( <i>plu4562</i> ) in pBAD24                            | This study |
| pBAD24-His- <i>pluR</i> -S115G | Substitution of S115G in <i>pluR</i> ( <i>plu4562</i> ) in pBAD24                           | This study |
| pBAD24-His- <i>pauR</i>        | <i>pauR</i> ( <i>pau_04062</i> ) in pBAD24 with N-terminal His-tag                          | [5]        |
| pBAD24-His- <i>pauR</i> -S38A  | Substitution of S38A in <i>pauR</i> ( <i>pau_04062</i> ) in pBAD24                          | This study |
| pBAD24-His- <i>pauR</i> -Y40A  | Substitution of Y40A in <i>pauR</i> ( <i>pau_04062</i> ) in pBAD24                          | This study |
| pBAD24-His- <i>pauR</i> -Y40F  | Substitution of Y40F in <i>pauR</i> ( <i>pau_04062</i> ) in pBAD24                          | This study |
| pBAD24-His- <i>pauR</i> -T62A  | Substitution of T62A in <i>pauR</i> ( <i>pau_04062</i> ) in pBAD24                          | [5]        |
| pBAD24-His- <i>pauR</i> -Y66A  | Substitution of Y66A in <i>pauR</i> ( <i>pau_04062</i> ) in pBAD24                          | [5]        |
| pBAD24-His- <i>pauR</i> -D75A  | Substitution of D75A in <i>pauR</i> ( <i>pau_04062</i> ) in pBAD24                          | [5]        |
| pBAD24-His- <i>pauR</i> -D75E  | Substitution of D75E in <i>pauR</i> ( <i>pau_04062</i> ) in pBAD24                          | This study |
| pBAD24-His- <i>pauR</i> -D75N  | Substitution of D75N in <i>pauR</i> ( <i>pau_04062</i> ) in pBAD24                          | This study |
| pBAD24-His- <i>pauR</i> -Q76A  | Substitution of Q76A in <i>pauR</i> ( <i>pau_04062</i> ) in pBAD24                          | This study |
| pBAD24-His- <i>pauR</i> -Y90A  | Substitution of Y90A in <i>pauR</i> ( <i>pau_04062</i> ) in pBAD24                          | This study |
| pBAD24-His- <i>pauR</i> -I113A | Substitution of I113A in <i>pauR</i> ( <i>pau_04062</i> ) in pBAD24                         | This study |
| pBBR1-MCS5-TT-RBS- <i>lux</i>  | <i>luxCDABE</i> and terminators lambda T0 rrnB1 T1 cloned into pBBR1-MCS5 for plasmid-based | [25]       |

|                                                  |                                                                            |     |
|--------------------------------------------------|----------------------------------------------------------------------------|-----|
|                                                  | transcriptional fusions; Gm <sup>R</sup>                                   |     |
| pBBR1-P <i>pcfA</i> <sub>P.i.</sub> - <i>lux</i> | <i>pcfA</i> ( <i>plu4568</i> ) promoter in pBBR1-MCS5-TT-RBS- <i>lux</i>   | [6] |
| pBBR1-P <i>pcfA</i> <sub>P.a.</sub> - <i>lux</i> | <i>pcfA</i> ( <i>pau_04068</i> ) promoter in pBBR1-MCS5-TT-RBS- <i>lux</i> | [5] |
