# Supplementary material for: Specificity of Signal-Binding via Non-AHL LuxR-Type Receptors
Source: PubMed Central journal article supplement (PMC4414361; doi:10.1371/journal.pone.0124093), 2015-04-29
Supplement: pone.0124093.s003.pdf [file pone.0124093.s003.pdf]

**S2 Table. Oligonucleotides used in this study.** Underlined nucleotides indicate the position of the site-directed mutagenesis.

| Oligo                | Sequence                                                           |
|----------------------|--------------------------------------------------------------------|
| Plu4562-6HisNcoIs    | 5'-GAGGAACCATGGCGCACCACCATCATCACCAT<br>AGGAAAATCTTATGAACACATC-3'   |
| 4562_Sall_rev        | 5'-TAGCCGTCGACTTATATGATTAGATTATATGC-3'                             |
| PluR_T62W_fwd        | 5'-TAAATATAGAAT <u>GGG</u> CAAGTAAT-3'                             |
| PluR_T62W_rev        | 5'-ATTACTTGCCATTCTATATTTA-3'                                       |
| PluR_Y66A_fwd        | 5'-GCAAGTAAT <u>GCT</u> AATCAAG-3'                                 |
| PluR_Y66A_rev        | 5'-CTTGATTAGCATTACTTGC-3'                                          |
| PluR_D75A_fwd        | 5'-CATGACAGCGCACAATTAATG-3'                                        |
| PluR_D75A_rev        | 5'-CATTAATTG <u>TGCG</u> CTGTCATG-3'                               |
| PluR_D75E_fwd        | 5'-CATGACAGCGAGCAATTAATG-3'                                        |
| PluR_D75E_rev        | 5'-CATTAATTG <u>CTCG</u> CTGTCATG-3'                               |
| PluR_D75N_fwd        | 5'-CATGACAGCAACCAATTAATG-3'                                        |
| PluR_D75N_rev        | 5'-CATTAATTG <u>GTTG</u> CTGTCATG-3'                               |
| PluR_Q76P_fwd        | 5'-GACAGCGACCCATTAATGAATG-3'                                       |
| PluR_Q76P_rev        | 5'-CATTCAATTAATGGGTCGCTGTC-3'                                      |
| PluR_C90W_fwd        | 5'-CCGTCAGTTT <u>GGA</u> ATGATAAA-3'                               |
| PluR_C90W_rev        | 5'-TTTATCATTCCAAACTGACGG-3'                                        |
| PluR_S115A_fwd       | 5'-GTCAAAAATGCTCTTTCAA-3'                                          |
| PluR_S115A_rev       | 5'-TTGAAAGAGCATTTTTGAC-3'                                          |
| PluR_S115G_fwd       | 5'-GTCAAAAATGGTCTTTCAA-3'                                          |
| PluR_S115G_rev       | 5'-TTGAAAGACCATTTTTGAC-3'                                          |
| PAU4062-His-NheI_fwd | 5'GAGGAAGCTAGCCGCACCACCATCATCACCATC<br>CCGGGATCTTATGAATACTTTATT-3' |
| 4062_Sall_rev        | 5'-TAGCCGTCGACTTATATGATTAGATTATATGC-3'                             |
| PauR_S38A_fwd        | 5'-GAATTTTACGCAATTTATCAGG-3'                                       |
| PauR_S38A_rev        | 5'-CCTGATAAATTGCGTAAAATTC-3'                                       |
| PauR_Y40A_fwd        | 5'-TACTCAATTGCTCAGGAAG-3'                                          |
| PauR_Y40A_rev        | 5'-CTTCCTGAGCAATTGAGTAA-3'                                         |
| PauR_Y40F_fwd        | 5'-TACTCAATTTTCCAGGAAG-3'                                          |
| PauR_Y40F_rev        | 5'-CTTCCTGGAAAATTGAGTAA-3'                                         |
| PauR_D75E_fwd        | 5'-CATGACAGTGAACAATAATG-3'                                         |
| PauR_D75E_rev        | 5'-CATTAGTTGTTCACTGTCATG-3'                                        |
| PauR_D75N_fwd        | 5'-CATGACAGTAATCAACTAATG-3'                                        |
| PauR_D75N_rev        | 5'-CATTAGTTGATTACTGTCATG-3'                                        |
| PauR_Q76A_fwd        | 5'-CATGACAGTGATGCACTAATG-3'                                        |
| PauR_Q76A_rev        | 5'-CATTAGTGCATCACTGTCATG-3'                                        |
| PauR_Y90A_fwd        | 5'-CTTCAATTGCTGATGAAAAAAC-3'                                       |
| PauR_Y90A_rev        | 5'-GTTTTTTTCATCAGCAATTGAAG-3'                                      |
| PauR_I113A_fwd       | 5'-GATTA AAAACGCTATTTCC-3'                                         |
| PauR_I113A_rev       | 5'-GGAAATAGCGTTTTTAATC-3'                                          |
