# Supplementary material for: Specificity of Signal-Binding via Non-AHL LuxR-Type Receptors
Source: PubMed Central journal article supplement (PMC4414361; doi:10.1371/journal.pone.0124093), 2015-04-29
Supplement: pone.0124093.s005.pdf [file pone.0124093.s005.pdf]

**S4 Table: Influence of amino acid substitutions within the SBD of PauR on general functionality and DAR-sensing.** PauR wild type and PauR derivatives were tested for their ability to activate *pcfA*<sub>P.a.</sub> promoter activity controlling the *luxCDABE* operon in the presence of 0.1% (w/v) arabinose or 3.5 nM DAR. Reporter gene activity was quantified 2 h after addition of 0.1% (w/v) arabinose (functionality [%]) or 3.5 nM DAR (DAR-sensing [%]) and compared to PauR wild type, which values were set to 100%. RLU, relative light units.

|            | Functionality [%] | std    | Sensing of 3.5nM DAR [%] | std    |
|------------|-------------------|--------|--------------------------|--------|
| PauR wt    | 100.0             | ± 8.3  | 100.0                    | ± 7.7  |
| PauR-S38A  | 92.2              | ± 8.9  | 25.5                     | ± 2.6  |
| PauR-Y40A  | 7.8               | ± 1.6  | 2.1                      | ± 0.5  |
| PauR-Y40F  | 49.8              | ± 5.4  | 57.4                     | ± 11.1 |
| PauR-T62A  | 98.6              | ± 10.5 | 5.4                      | ± 0.3  |
| PauR-Y66A  | 98.9              | ± 10.8 | 25.4                     | ± 2.8  |
| PauR-D75A  | 92.6              | ± 8.1  | 33.4                     | ± 4.9  |
| PauR-D75E  | 25.7              | ± 2.0  | 2.2                      | ± 0.5  |
| PauR-D75N  | 75.2              | ± 4.4  | 10.5                     | ± 1.9  |
| PauR-Q76A  | 49.3              | ± 6.1  | 10.4                     | ± 1.0  |
| PauR-Y90C  | 91.6              | ± 8.1  | 64.2                     | ± 3.7  |
| PauR-I113S | 89.5              | ± 5.1  | 53.4                     | ± 7.6  |
