# Supplementary material for: Specificity of Signal-Binding via Non-AHL LuxR-Type Receptors
Source: PLoS One. 2015 Apr 29;10(4):e0124093. doi: 10.1371/journal.pone.0124093 (PMC4414361; doi:10.1371/journal.pone.0124093)
Supplement: S3 Table — PluR wild type and PluR derivatives were tested for their ability to activate pcfA P.l. promoter activity controlling the luxCDABE operon in the presence of 0.1% (w/v) arabinose or 3.5 nM PPYD. Reporter gene activity was quantified 2 h after addition of 0.1% (w/v) arabinose (functionality [%]) or 3.5 nM PPYD (PPYD-sensing [%]) and compared to PluR wild type, which values were set to 100%. RLU, relative light units. Std, standard deviation of three biological experiments. (PDF) [file pone.0124093.s004.pdf]

**S3 Table: Influence of amino acid substitutions within the SBD of PluR on general functionality and PPYD-sensing.** PluR wild type and PluR derivatives were tested for their ability to activate *pcfA*<sub>P.L.</sub> promoter activity controlling the *luxCDABE* operon in the presence of 0.1% (w/v) arabinose or 3.5 nM PPYD. Reporter gene activity was quantified 2 h after addition of 0.1% (w/v) arabinose (functionality [%]) or 3.5 nM PPYD (PPYD-sensing [%]) and compared to PluR wild type, which values were set to 100%. RLU, relative light units. Std, standard deviation of three biological experiments.

|            | Functionality [%] | std    | Sensing of 3.5nM PPYD [%] | std   |
|------------|-------------------|--------|---------------------------|-------|
| PluR wt    | 100.0             | ± 7.4  | 100.0                     | ± 7,4 |
| PluR-T62W  | 113.0             | ± 6.8  | 95.4                      | ± 6,8 |
| PluR-Y66A  | 87.7              | ± 5.7  | 35.4                      | ± 5.7 |
| PluR-D75A  | 100.4             | ± 11.8 | 25.5                      | ± 1.8 |
| PluR-D75E  | 48.4              | ± 3.2  | 30.4                      | ± 3.2 |
| PluR-D75N  | 96.4              | ± 8.3  | 35.5                      | ± 8.3 |
| PluR-Q76A  | 97.2              | ± 9.1  | 2.2                       | ± 0.4 |
| PluR-Q76P  | 109.1             | ± 5.9  | 50.4                      | ± 5.9 |
| PluR-C90W  | 120.7             | ± 9.3  | 15.4                      | ± 3.3 |
| PluR-S115A | 102.7             | ± 10.1 | 25.3                      | ±10.1 |
| PluR-S115G | 47.3              | ± 7.6  | 12.4                      | ± 4.6 |
